# Supplementary material
Source: publisher figshare collection journal article supplement (https://acs.figshare.com/ndownloader/files/21809871)
Supplement: Supplementary file 1 [file 21809871]

## Sheet: IC50vsBE
Structure	Name	IC50 μM	Binding Energy Kcal/mol
	Table1-1	1.5	-31.89
	Table1-4	42	-27.53
	Table1-5	55	-22.75
	Table1-6	62	-21.05
	Table1-7	11	-28.59
	Table1-9	45	-27.67
	Table2-1	1.5	-31.06
	Table2-2	45	-25.85
	Table2-3	75	-17.98
	Table2-4	35	-27.92
	Table2-6	85	-16.54
	Table2-7	25	-23.06
	Table2-8	15	-25.55
	Table2-9	62	-22.13

## Sheet: AllTrialSets
Title	Entry ID	State Penalty	Tot Q	Potential Energy-OPLS-2005	Prime Coulomb	Prime Covalent	Prime vdW	Prime Solv GB	Prime Lipo	Prime Energy	glide rewards	cdock affinity	Job Name	tautomer probability
molecule_198	2	0.3433	0	187.736	-55.896	37.401	14.812	-24.473	-9.284	-37.4	-0.658	-5.367	covalent_docking_Set_2_and_3
molecule_236	3	0	-1	258.186	-37.148	48.551	17.69	-31.517	-8.606	-11	-0.57	-4.948	covalent_docking_Set_2_and_3	1
molecule_198	4	0.4934	-1	205.532	-43.246	34.143	17.447	-30.433	-7.753	-29.8	-0.665	-4.93	covalent_docking_Set_2_and_3
molecule_171	5	0	0	245.924	20.771	45.497	13.633	-15.272	-8.128	56.5	-0.638	-4.117	covalent_docking_Set_2_and_3	1
molecule_67	6	0.0454	0	246.075	-3.915	43.227	18.901	-9.079	-9.786	39.3	-0.399	-3.922	covalent_docking_Set_2_and_3
molecule_228	7	0	0	281.453	18.631	55.882	12.594	-17.486	-9.162	60.5	-0.542	-3.858	covalent_docking_Set_2_and_3	1
molecule_134	8	0.2006	0	189.406	-9.413	33.19	13.887	-8.594	-8.158	20.9	-0.992	-3.812	covalent_docking_Set_2_and_3
Set_2_24	9	0	0	246.003	-40.509	44.844	20.726	-13.319	-9.669	2.1	-0.032	-3.8	covalent_docking_Set_2_and_3	1
molecule_68	10	0.0454	0	238.628	3.847	41.146	17.898	-9.329	-9.865	43.7	-0.548	-3.739	covalent_docking_Set_2_and_3
molecule_71	11	0.0454	0	246.559	0.704	41.179	19.83	-8.303	-9.677	43.7	-0.262	-3.707	covalent_docking_Set_2_and_3
molecule_97	12	0	0	266.787	0.69	48.435	16.439	-9.87	-11.01	44.7	-0.315	-3.701	covalent_docking_Set_2_and_3	1
molecule_218	13	0	0	280.843	2.968	52.58	15.938	-15.426	-9.705	46.4	-0.201	-3.661	covalent_docking_Set_2_and_3	1
molecule_70	14	0.0454	0	254.034	-2.182	46.349	19.091	-8.26	-9.771	45.2	-0.262	-3.661	covalent_docking_Set_2_and_3
molecule_170	15	0.0142	0	228.526	4.103	43.919	12.822	-9.392	-11.522	39.9	-0.528	-3.643	covalent_docking_Set_2_and_3
molecule_44	16	0.0085	0	64.751	-55.661	9.649	11.946	-8.551	-7.418	-50	-0.774	-3.64	covalent_docking_Set_2_and_3
molecule_52	17	0.0454	0	278.007	4.863	49.311	19.765	-9.367	-12.792	51.8	-0.365	-3.636	covalent_docking_Set_2_and_3
molecule_79	18	0.7143	1	199.708	-3.751	37.908	10.062	-17.281	-9.325	17.6	-1.081	-3.601	covalent_docking_Set_2_and_3
molecule_165	19	0.6272	0	235.736	-47.088	43.067	18.53	-12.199	-9.31	-7	-0.296	-3.587	covalent_docking_Set_2_and_3
molecule_96	20	0	0	266.616	-5.87	50.5	16.844	-9.789	-10.968	40.7	-0.303	-3.586	covalent_docking_Set_2_and_3	1
molecule_169	21	0.3804	1	259.392	11.459	49.082	11.799	-19.292	-9.671	43.4	-0.631	-3.582	covalent_docking_Set_2_and_3
molecule_99	22	0	0	272.158	-4.968	54.678	15.369	-8.496	-11.128	45.5	-0.167	-3.573	covalent_docking_Set_2_and_3	1
molecule_56	23	0.0454	0	238.351	-0.294	40.775	18.612	-7.987	-10.137	41	-0.474	-3.517	covalent_docking_Set_2_and_3
Set_2_10	24	0	0	284.829	15.467	48.512	21.642	-7.964	-10.177	67.5	0	-3.511	covalent_docking_Set_2_and_3	1
molecule_134	25	0.739	1	218.98	-7.007	39.52	12.355	-20.129	-8.01	16.7	-0.986	-3.501	covalent_docking_Set_2_and_3
Set_2_28	26	0	0	258.659	-50.584	48.389	20.712	-8.872	-10.022	-0.4	-0.063	-3.497	covalent_docking_Set_2_and_3	1
molecule_234	27	0	0	262.268	-24.702	50.253	18.059	-8.172	-10.408	25	-0.467	-3.489	covalent_docking_Set_2_and_3	1
molecule_49	28	0.739	1	226.968	-6.81	41.532	12.366	-20.415	-8.928	17.7	-0.986	-3.474	covalent_docking_Set_2_and_3
Set_2_25	29	0	0	282.312	-5.857	49.199	21.898	-10.215	-9.543	45.5	-0.293	-3.465	covalent_docking_Set_2_and_3	1
molecule_34	30	0	0	57.48	-6.454	9.82	5.877	-9.177	-6.856	-6.8	-0.856	-3.457	covalent_docking_Set_2_and_3	1
molecule_93	31	0	0	266.072	-1.966	52.793	14.686	-8.656	-13.858	43	0	-3.413	covalent_docking_Set_2_and_3	1
molecule_94	32	0	0	257.357	-8.216	48.318	16.399	-8.378	-11.961	36.2	0	-3.409	covalent_docking_Set_2_and_3	1
molecule_20	33	0	0	93.666	-8.961	13.805	11.099	-8.798	-7.456	-0.3	-0.474	-3.409	covalent_docking_Set_2_and_3	1
molecule_78	34	0	0	211.228	-13.994	40.363	12.587	-9.268	-9.359	20.3	-0.897	-3.406	covalent_docking_Set_2_and_3	1
molecule_41	35	0	0	54.018	-12.535	9.966	5.279	-8.171	-7.811	-13.3	-0.733	-3.398	covalent_docking_Set_2_and_3	1
molecule_55	36	0.0454	0	245.325	4.721	42.456	18.784	-7.936	-11.292	46.7	-0.474	-3.396	covalent_docking_Set_2_and_3
molecule_69	37	0.0454	0	240.256	7.018	41.149	18.151	-9.608	-9.853	46.9	-0.531	-3.379	covalent_docking_Set_2_and_3
Set_2_8	38	0.0269	1	251.605	0.258	43.918	15.787	-21.505	-11.391	27.1	-0.514	-3.378	covalent_docking_Set_2_and_3
molecule_111	39	0	0	279.4	-8.03	50.388	18.246	-9.205	-12.184	39.2	-0.269	-3.376	covalent_docking_Set_2_and_3	1
Set_2_27	40	0	0	264.985	-28.946	47.021	21.55	-10.83	-9.8	19	-0.084	-3.357	covalent_docking_Set_2_and_3	1
molecule_47	41	0	0	65.421	-2.305	9.598	7.349	-8.747	-8.114	-2.2	-0.877	-3.357	covalent_docking_Set_2_and_3	1
molecule_163	42	0.0241	0	255.804	17.868	44.081	17.265	-10.142	-9.13	59.9	-0.29	-3.351	covalent_docking_Set_2_and_3
molecule_73	43	0.0454	0	246.902	-6.335	43.358	19.35	-8.43	-10.848	37.1	-0.106	-3.349	covalent_docking_Set_2_and_3
molecule_79	44	0.2109	0	175.56	-1.943	32.654	10.818	-8.352	-10.059	23.1	-1.088	-3.347	covalent_docking_Set_2_and_3
molecule_107	45	0	0	211.228	-13.995	40.357	12.593	-9.175	-9.357	20.4	-1.009	-3.347	covalent_docking_Set_2_and_3	1
molecule_42	46	0.5883	0	65.64	-9.754	12.194	5.445	-11.149	-6.418	-9.7	-0.854	-3.344	covalent_docking_Set_2_and_3
molecule_49	47	0.2006	0	189.405	-9.414	33.192	13.885	-8.754	-8.157	20.8	-0.992	-3.321	covalent_docking_Set_2_and_3
molecule_190	48	0.7825	0	194.476	-8.646	36.096	12.822	-9.496	-7.568	23.2	-0.638	-3.3	covalent_docking_Set_2_and_3
molecule_233	49	0	0	258.2	25.616	49.865	11.948	-10.912	-9.669	66.8	-0.536	-3.3	covalent_docking_Set_2_and_3	1
molecule_31	50	0.0601	1	93.078	14.285	11.36	10.452	-46.226	-7.134	-17.3	-0.501	-3.292	covalent_docking_Set_2_and_3
molecule_17	51	0	0	80.605	-7.48	10.09	10.694	-8.865	-7.483	-3	-0.61	-3.284	covalent_docking_Set_2_and_3	1
molecule_54	52	0.0454	0	254.165	-0.728	43.246	19.95	-8.984	-10.304	43.2	-0.457	-3.274	covalent_docking_Set_2_and_3
molecule_101	53	0	0	270.654	2.159	48.853	18.196	-9.217	-10.999	49	-0.167	-3.27	covalent_docking_Set_2_and_3	1
molecule_173	54	0.0272	0	212.461	-0.074	39.031	13.782	-8.608	-9.398	34.7	-0.746	-3.269	covalent_docking_Set_2_and_3
molecule_89	55	0	0	260.754	-1.994	48.427	16.807	-8.696	-11.001	43.5	-0.562	-3.261	covalent_docking_Set_2_and_3	1
molecule_100	56	0	0	268.336	-2.016	48.816	17.921	-8.943	-11.017	44.8	-0.207	-3.26	covalent_docking_Set_2_and_3	1
molecule_19	57	0	0	76.705	-7.112	9.579	10.497	-8.672	-7.493	-3.2	-0.67	-3.25	covalent_docking_Set_2_and_3	1
molecule_115	58	0	0	260.672	-3.329	48.224	17.018	-8.287	-11.176	42.4	-0.378	-3.236	covalent_docking_Set_2_and_3	1
molecule_23	59	0	0	86.559	-6.624	10.556	11.708	-8.683	-7.959	-1	-0.455	-3.236	covalent_docking_Set_2_and_3	1
molecule_110	60	0	0	282.585	0.617	53.878	16.874	-9.295	-12.792	49.3	-0.269	-3.229	covalent_docking_Set_2_and_3	1
molecule_38	61	0	0	53.303	-11.321	9.344	5.61	-7.411	-6.969	-10.7	-0.849	-3.224	covalent_docking_Set_2_and_3	1
molecule_60	62	0.0454	0	238.57	1.262	41.116	18.292	-8.247	-9.851	42.6	-0.545	-3.222	covalent_docking_Set_2_and_3
Set_2_18	63	0.0454	0	277.451	10.208	47.644	20.656	-10.192	-10.221	58.1	-0.04	-3.222	covalent_docking_Set_2_and_3
Set_2_17	64	0.0454	0	276.056	5.563	47.288	20.947	-9.851	-10.035	53.9	0	-3.219	covalent_docking_Set_2_and_3
molecule_192	65	0.0174	0	185.916	-8.46	34.504	11.293	-7.333	-9.719	20.3	-0.638	-3.206	covalent_docking_Set_2_and_3
molecule_175	66	0.0089	0	232.853	18.642	44.271	12.794	-10.744	-11.004	54	-0.521	-3.205	covalent_docking_Set_2_and_3
molecule_223	67	1.318	0	259.208	-51.107	51.404	16.807	-13.048	-10.656	-6.6	-0.271	-3.204	covalent_docking_Set_2_and_3
molecule_172	68	0.0218	0	216.957	9.937	39.491	13.698	-10.273	-9.402	43.5	-0.724	-3.202	covalent_docking_Set_2_and_3
molecule_13	69	0	0	74.449	-12.491	9.526	10.449	-7.43	-7.902	-7.8	-0.602	-3.199	covalent_docking_Set_2_and_3	1
molecule_206	70	1.1184	1	93.06	12.123	9.98	10.875	-19.276	-9.142	4.6	-0.733	-3.198	covalent_docking_Set_2_and_3
molecule_114	71	0	0	260.122	-3.644	50.625	14.69	-8.544	-13.087	40	-0.378	-3.196	covalent_docking_Set_2_and_3	1
molecule_116	72	0	0	266.235	0.158	49.208	17.325	-10.86	-10.312	45.5	-0.351	-3.19	covalent_docking_Set_2_and_3	1
molecule_128	73	0.1486	0	228.275	-4.593	38.613	18.349	-6.903	-10.267	35.2	-0.318	-3.189	covalent_docking_Set_2_and_3
molecule_160	74	0.1193	1	128.578	15.154	13.273	15.715	-16.904	-13.071	14.2	-0.194	-3.187	covalent_docking_Set_2_and_3
molecule_53	75	0.0454	0	251.623	-4.721	43.189	19.654	-8.682	-11.241	38.2	-0.365	-3.187	covalent_docking_Set_2_and_3
Set_2_23	76	0.0308	1	162.048	-3.18	24.773	14.404	-18.692	-10.087	7.2	-0.624	-3.179	covalent_docking_Set_2_and_3
molecule_206	77	0.4985	0	176.714	14.747	30.677	11.781	-6.142	-9.027	42	-0.74	-3.166	covalent_docking_Set_2_and_3
molecule_59	78	0.0454	0	236.625	-5.938	41.104	18.273	-7.775	-9.862	35.8	-0.641	-3.156	covalent_docking_Set_2_and_3
molecule_58	79	0.0454	0	238.986	-0.15	41.872	18.325	-7.51	-9.792	42.7	-0.447	-3.152	covalent_docking_Set_2_and_3
molecule_27	80	0	0	76.071	-14.117	13.365	7.09	-8.232	-9.266	-11.2	-0.378	-3.148	covalent_docking_Set_2_and_3	1
molecule_216	81	0	1	101.188	-22.98	8.782	16.854	-18.739	-9.768	-25.9	-0.655	-3.148	covalent_docking_Set_2_and_3	1
molecule_88	82	0	0	258.382	-9.357	48.177	16.921	-8.199	-10.974	36.6	-0.351	-3.146	covalent_docking_Set_2_and_3	1
molecule_46	83	0	0	50.374	-105.047	10.4	13.327	-11.05	-6.549	-98.9	-0.92	-3.143	covalent_docking_Set_2_and_3	1
molecule_26	84	0	0	79.76	-6.14	11.409	9.248	-10.257	-7.156	-2.9	-0.531	-3.136	covalent_docking_Set_2_and_3	1
molecule_108	85	0.2109	0	175.56	-1.951	32.64	10.831	-8.373	-10.058	23.1	-1.088	-3.133	covalent_docking_Set_2_and_3
molecule_9	86	0	0	74.963	-12.617	9.532	10.591	-7.305	-7.49	-7.3	-0.734	-3.128	covalent_docking_Set_2_and_3	1
Set_2_26	87	0	0	254.509	-28.299	46.683	20.294	-10.211	-9.669	18.8	0	-3.127	covalent_docking_Set_2_and_3	1
molecule_18	88	0	0	76.341	-6.988	9.574	10.353	-8.719	-7.508	-3.3	-0.636	-3.121	covalent_docking_Set_2_and_3	1
molecule_102	89	0	0	282.245	-6.858	54.028	17.787	-11.752	-11.44	41.8	-0.01	-3.12	covalent_docking_Set_2_and_3	1
molecule_169	90	0.4426	0	221.253	8.522	40.564	13.385	-8.015	-9.075	45.4	-0.718	-3.119	covalent_docking_Set_2_and_3
molecule_177	91	0.0218	0	239.866	-21.705	42.851	19.634	-7.747	-9.202	23.8	-0.563	-3.114	covalent_docking_Set_2_and_3
molecule_35	92	0	0	59.014	-6.72	10.243	5.797	-9.923	-7.033	-7.6	-0.856	-3.106	covalent_docking_Set_2_and_3	1
molecule_232	93	0	0	254.876	13.157	53.677	9.412	-10.414	-13.729	52.1	-0.426	-3.1	covalent_docking_Set_2_and_3	1
molecule_168	94	0.0218	0	228.696	7.63	42.322	13.495	-10.747	-8.976	43.7	-0.737	-3.097	covalent_docking_Set_2_and_3
Set_2_20	95	0	0	86.688	-4.038	9.166	12.88	-5.02	-7.033	6	-1.231	-3.089	covalent_docking_Set_2_and_3	1
molecule_176	96	0.0241	0	235.691	29.137	42.509	13.414	-10.747	-8.591	65.7	-0.631	-3.089	covalent_docking_Set_2_and_3
molecule_217	97	0	1	95.978	-26.566	8.735	16.697	-19.243	-9.885	-30.3	-0.667	-3.088	covalent_docking_Set_2_and_3	1
molecule_51	98	0.0454	0	239.015	1.853	40.77	18.631	-8.055	-9.676	43.5	-0.569	-3.087	covalent_docking_Set_2_and_3
molecule_119	99	0.1486	0	209.091	-2.611	34.951	15.739	-7.38	-12.446	28.3	-0.334	-3.087	covalent_docking_Set_2_and_3
molecule_113	100	0	0	267.559	0.889	51.742	15.857	-8.126	-13.426	46.9	-0.378	-3.083	covalent_docking_Set_2_and_3	1
molecule_86	101	0	0	261.185	-2.863	48.487	16.867	-8.86	-11.212	42.4	-0.378	-3.077	covalent_docking_Set_2_and_3	1
molecule_62	102	0.0454	0	235.795	-4.693	41.038	18.022	-7.926	-10.896	35.5	-0.334	-3.075	covalent_docking_Set_2_and_3
molecule_25	103	0	0	80.438	-6.291	9.738	11.294	-7.681	-7.763	-0.7	-0.508	-3.073	covalent_docking_Set_2_and_3	1
molecule_222	104	0.637	0	258.025	-50.25	50.528	17.015	-13.037	-10.533	-6.3	-0.201	-3.071	covalent_docking_Set_2_and_3
Set_2_1	105	0.0179	1	157.336	-10.308	22.139	16.082	-18.674	-9.273	0	-0.467	-3.066	covalent_docking_Set_2_and_3
molecule_202	106	0.4985	0	187.167	-25.869	31.271	17.039	-7.382	-9.2	5.9	-0.392	-3.061	covalent_docking_Set_2_and_3
molecule_174	107	0.0272	0	219.38	3.777	40.982	13.529	-9.227	-10.07	39	-0.611	-3.059	covalent_docking_Set_2_and_3
molecule_21	108	0	0	84.44	-8.643	9.972	11.876	-7.664	-7.515	-2	-0.557	-3.058	covalent_docking_Set_2_and_3	1
molecule_219	109	0	0	271.66	-1.165	52.855	14.969	-10.495	-12.507	43.7	-0.085	-3.053	covalent_docking_Set_2_and_3	1
molecule_40	110	0	0	58.457	-7.634	10.585	5.361	-10.268	-6.559	-8.5	-0.843	-3.047	covalent_docking_Set_2_and_3	1
molecule_149	111	0.1193	1	119.206	9.209	13.371	14.416	-15.005	-14.99	7	-0.12	-3.046	covalent_docking_Set_2_and_3
molecule_235	112	0	0	247.544	-42.494	48.476	17.772	-9.622	-10.612	3.5	-0.467	-3.038	covalent_docking_Set_2_and_3	1
molecule_33	113	0.4886	0	78.221	-31.013	11.266	11.126	-10.111	-7.356	-26.1	-0.508	-3.036	covalent_docking_Set_2_and_3
molecule_61	114	0.0454	0	241.238	0.615	42.366	18.371	-7.961	-11.935	41.5	-0.384	-3.029	covalent_docking_Set_2_and_3
molecule_118	115	0.1486	0	200.741	-8.029	34.657	15.119	-8.508	-12.585	20.7	-0.447	-3.026	covalent_docking_Set_2_and_3
molecule_131	116	0.1486	0	218.879	-0.294	36.052	16.984	-7.31	-11.667	33.8	-0.106	-3.02	covalent_docking_Set_2_and_3
molecule_164	117	0	0	240.645	-33.61	43.137	18.401	-10.49	-8.862	8.6	-0.296	-3.017	covalent_docking_Set_2_and_3	1
molecule_98	118	0	0	268.62	3.754	48.45	16.669	-10.158	-11.001	47.7	-0.504	-3.012	covalent_docking_Set_2_and_3	1
molecule_129	119	0.1486	0	214.747	-7.003	34.832	17.49	-7.222	-10.314	27.8	-0.262	-3.012	covalent_docking_Set_2_and_3
molecule_211	120	0.6072	1	102.444	7.596	11.911	11.048	-17.444	-9.31	3.8	-0.726	-3.008	covalent_docking_Set_2_and_3
molecule_220	121	0	0	278.281	14.921	51.465	15.74	-10.456	-10.327	61.3	-0.313	-2.999	covalent_docking_Set_2_and_3	1
molecule_166	122	1.3256	0	236.947	-47.91	44.004	18.275	-12.327	-9.447	-7.4	-0.298	-2.998	covalent_docking_Set_2_and_3
molecule_2	123	0	0	89.711	-15.816	12.031	12.013	-8.328	-8.99	-9.1	-0.576	-2.996	covalent_docking_Set_2_and_3	1
molecule_74	124	0.0454	0	241.647	2.17	41.33	18.664	-7.828	-10.513	43.8	-0.201	-2.995	covalent_docking_Set_2_and_3
molecule_180	125	1.3553	1	212.382	16.749	35.017	17.32	-51.121	-8.067	9.9	-0.289	-2.99	covalent_docking_Set_2_and_3
molecule_103	126	0	0	263.859	-1.006	48.607	17.208	-8.273	-11.634	44.9	-0.145	-2.974	covalent_docking_Set_2_and_3	1
molecule_29	127	0	0	75.55	-12.287	10.336	9.681	-8.222	-7.617	-8.1	-0.515	-2.973	covalent_docking_Set_2_and_3	1
molecule_155	128	0.1193	1	142.513	11.261	16.906	16.555	-15.184	-12.86	16.7	-0.351	-2.972	covalent_docking_Set_2_and_3
molecule_57	129	0.0454	0	238.809	-0.239	40.845	18.641	-7.954	-9.879	41.4	-0.474	-2.969	covalent_docking_Set_2_and_3
molecule_202	130	1.1184	1	105.17	-22.486	10.551	15.947	-20.489	-9.42	-25.9	-0.393	-2.958	covalent_docking_Set_2_and_3
molecule_63	131	0.0454	0	237.831	1.022	40.775	18.386	-8.056	-9.955	42.2	-0.432	-2.954	covalent_docking_Set_2_and_3
molecule_161	132	0	0	258.525	5.979	45.115	17.468	-14.173	-8.411	46	-0.461	-2.954	covalent_docking_Set_2_and_3	1
molecule_205	133	0.8809	0	194.868	-19.892	32.146	17.191	-7.626	-9.666	12.2	-0.445	-2.954	covalent_docking_Set_2_and_3
molecule_230	134	0	0	234.957	-3.164	46.483	12.245	-9.14	-10.552	35.9	-0.542	-2.952	covalent_docking_Set_2_and_3	1
molecule_195	135	0.01	0	191.99	5.071	35.114	10.991	-8.548	-8.919	33.7	-0.631	-2.95	covalent_docking_Set_2_and_3
molecule_211	136	0.6821	1	87.006	10.496	8.924	10.886	-17.887	-9.423	3	-0.726	-2.943	covalent_docking_Set_2_and_3
molecule_225	137	0	0	251.009	4.459	49.777	11.994	-11.506	-10.199	44.5	-0.641	-2.939	covalent_docking_Set_2_and_3	1
molecule_178	138	0.0218	0	225.323	-39.509	40.857	19.522	-9.243	-9.363	2.3	-0.654	-2.927	covalent_docking_Set_2_and_3
molecule_117	139	0.1486	0	205.191	-11.248	34.396	16.179	-7.111	-10.314	21.9	-0.447	-2.922	covalent_docking_Set_2_and_3
molecule_85	140	0	0	260.516	-2.862	48.424	16.771	-8.916	-11.689	41.7	-0.454	-2.92	covalent_docking_Set_2_and_3	1
molecule_197	141	0.1486	0	196.944	-40.523	34.711	16.932	-8.844	-10.032	-7.8	-0.563	-2.918	covalent_docking_Set_2_and_3
molecule_205	142	0.9113	1	120.676	-29.7	13.397	16.951	-19.573	-9.602	-28.5	-0.385	-2.914	covalent_docking_Set_2_and_3
molecule_214	143	0.5464	1	117.136	21.511	15.593	10.041	-17.962	-10.971	18.2	-0.719	-2.912	covalent_docking_Set_2_and_3
molecule_213	144	0.2712	0	177.583	25.955	30.401	10.777	-6.86	-10.267	50	-0.617	-2.903	covalent_docking_Set_2_and_3
molecule_146	145	0.1193	1	105.582	8.817	8.96	15.77	-16.391	-12.397	4.8	-0.423	-2.9	covalent_docking_Set_2_and_3
molecule_120	146	0.1486	0	204.524	-10.856	34.339	16.126	-7.149	-11.24	21.2	-0.334	-2.895	covalent_docking_Set_2_and_3
molecule_90	147	0	0	269.117	-2.03	52.655	15.495	-8.746	-13.811	43.6	-0.239	-2.889	covalent_docking_Set_2_and_3	1
molecule_124	148	0.8922	1	210.447	-6.163	37.007	13.668	-17.737	-12.291	14.5	-0.024	-2.885	covalent_docking_Set_2_and_3
molecule_11	149	0	0	75.236	-14.55	9.783	10.483	-7.597	-8.952	-10.8	-0.546	-2.882	covalent_docking_Set_2_and_3	1
molecule_182	150	0.01	0	211.324	-1.23	35.922	14.945	-8.063	-9.677	31.9	-0.306	-2.877	covalent_docking_Set_2_and_3
molecule_143	151	0.1193	1	119.725	8.8	13.201	14.899	-15.385	-12.743	8.8	-0.55	-2.877	covalent_docking_Set_2_and_3
molecule_80	152	0	0	261.402	-0.769	48.403	16.87	-8.785	-11.004	44.7	-0.575	-2.876	covalent_docking_Set_2_and_3	1
molecule_32	153	0.0238	1	93.004	15.559	11.375	10.556	-47.95	-7.262	-17.7	-0.501	-2.873	covalent_docking_Set_2_and_3
molecule_91	154	0	0	257.985	-7.889	48.319	16.559	-8.4	-12.012	36.6	-0.352	-2.87	covalent_docking_Set_2_and_3	1
molecule_48	155	0	0	76.026	-7.623	11.232	9.078	-7.116	-9.901	-4.3	-0.685	-2.869	covalent_docking_Set_2_and_3	1
molecule_1	156	0	0	75.835	-11.613	9.617	10.666	-6.999	-7.501	-5.8	-0.787	-2.869	covalent_docking_Set_2_and_3	1
molecule_104	157	0	0	266.242	4.661	48.65	17.404	-8.955	-11.182	50.6	-0.01	-2.868	covalent_docking_Set_2_and_3	1
molecule_185	158	0	1	218.797	0.532	35.641	18.361	-44.94	-8.849	0.7	-0.289	-2.866	covalent_docking_Set_2_and_3	1
molecule_109	159	0	0	261.402	-0.771	48.407	16.868	-8.737	-11.004	44.8	-0.566	-2.866	covalent_docking_Set_2_and_3	1
molecule_194	160	0	0	185.787	-0.979	34.29	10.786	-7.725	-10.604	25.8	-0.521	-2.865	covalent_docking_Set_2_and_3	1
molecule_65	161	0.0454	0	235.163	-5.031	41.04	17.856	-7.829	-10.844	35.2	-0.125	-2.855	covalent_docking_Set_2_and_3
molecule_127	162	0.8922	1	213.002	-0.776	37.051	13.824	-19.138	-11.923	19	-0.395	-2.853	covalent_docking_Set_2_and_3
molecule_214	163	0.5625	0	183.694	31.878	31.207	10.978	-7.633	-8.581	57.8	-0.726	-2.853	covalent_docking_Set_2_and_3
molecule_212	164	0.666	0	180.68	17.526	31.792	10.853	-6.551	-9.898	43.7	-0.623	-2.845	covalent_docking_Set_2_and_3
molecule_167	165	1.078	1	263.379	33.344	43.98	18.15	-54.083	-9.452	31.9	-0.289	-2.834	covalent_docking_Set_2_and_3
molecule_64	166	0.0454	0	239.174	0.622	42.383	17.882	-7.841	-11.917	41.1	-0.031	-2.834	covalent_docking_Set_2_and_3
molecule_28	167	0.0428	0	79.927	-13.689	11.516	9.544	-12.745	-6.768	-12.1	-0.508	-2.833	covalent_docking_Set_2_and_3
molecule_125	168	0.8922	1	216.26	0.306	37.632	14.205	-17.507	-11.948	22.7	-0.392	-2.826	covalent_docking_Set_2_and_3
molecule_179	169	0.0218	0	230.909	-38.142	41.076	19.449	-9.669	-9.644	3.1	-0.563	-2.826	covalent_docking_Set_2_and_3
molecule_5	170	0	0	79.38	-11.415	10.27	10.508	-8.193	-8.154	-7	-0.685	-2.824	covalent_docking_Set_2_and_3	1
Set_2_21	171	0.0173	1	75.866	-0.563	6.161	11.736	-17.875	-6.719	-7.3	-1.129	-2.823	covalent_docking_Set_2_and_3
molecule_4	172	0	0	90.763	-14.194	11.621	12.311	-8.455	-7.879	-6.6	-0.576	-2.823	covalent_docking_Set_2_and_3	1
molecule_37	173	0	0	58.001	-11.387	10.39	5.804	-8.084	-7.451	-10.7	-0.74	-2.821	covalent_docking_Set_2_and_3	1
molecule_30	174	0.0021	0	70.269	-35.655	10.395	10.653	-10.694	-7.245	-32.5	-0.509	-2.819	covalent_docking_Set_2_and_3
molecule_3	175	0	0	90.187	-16.168	17.642	9.327	-6.68	-13.048	-8.9	-0.576	-2.817	covalent_docking_Set_2_and_3	1
molecule_8	176	0	0	74.454	-15.418	9.501	10.696	-7.377	-7.473	-10.1	-0.658	-2.816	covalent_docking_Set_2_and_3	1
molecule_201	177	0.5625	0	203.009	25.552	32.018	14.954	-7.128	-9.33	56.1	-0.385	-2.815	covalent_docking_Set_2_and_3
Set_2_15	178	0.0218	1	252.253	4.682	43.992	15.781	-21.455	-11.09	31.9	-0.616	-2.815	covalent_docking_Set_2_and_3
molecule_214	179	0.9098	1	112.075	7.378	16.599	10.247	-18.423	-11.228	4.6	-0.72	-2.803	covalent_docking_Set_2_and_3
molecule_84	180	0	0	273.312	2.299	51.73	16.543	-8.63	-12.311	49.6	-0.594	-2.802	covalent_docking_Set_2_and_3	1
molecule_22	181	0	0	84.867	-8.756	9.977	12.032	-7.777	-7.49	-2	-0.474	-2.8	covalent_docking_Set_2_and_3	1
molecule_24	182	0	0	80.248	-4.883	9.718	11.068	-8.716	-7.913	-0.7	-0.531	-2.796	covalent_docking_Set_2_and_3	1
molecule_121	183	0.1486	0	200.266	-7.589	34.742	14.88	-8.595	-13.05	20.4	-0.334	-2.794	covalent_docking_Set_2_and_3
molecule_108	184	0.7143	1	204.908	0.571	38.703	9.518	-21.038	-9.958	17.8	-1.081	-2.788	covalent_docking_Set_2_and_3
Set_2_9	185	1.0653	1	249.824	24.081	43.625	13.605	-18.322	-10.872	52.1	-0.61	-2.783	covalent_docking_Set_2_and_3
molecule_200	186	0.2712	0	195.838	14.475	31.635	14.698	-6.599	-11.182	43	-0.304	-2.778	covalent_docking_Set_2_and_3
Set_2_16	187	0.998	0	247.402	6.991	42.949	16.4	-9.919	-10.859	45.6	-0.521	-2.778	covalent_docking_Set_2_and_3
molecule_207	188	1.164	0	177.734	23.31	30.402	10.922	-6.672	-9.098	48.9	-0.733	-2.776	covalent_docking_Set_2_and_3
molecule_210	189	1.1184	1	103.544	11.788	13.917	9.911	-17.854	-12.059	5.7	-0.733	-2.772	covalent_docking_Set_2_and_3
molecule_199	190	0.2689	0	197.036	1.845	32.315	15.871	-7.959	-8.871	33.2	-0.446	-2.768	covalent_docking_Set_2_and_3
molecule_144	191	0.1193	1	107.052	9.054	8.672	15.798	-17.362	-10.03	6.1	-0.535	-2.762	covalent_docking_Set_2_and_3
molecule_123	192	0.1486	0	204.025	-10.944	34.312	16.01	-7.025	-11.128	21.2	-0.031	-2.76	covalent_docking_Set_2_and_3
molecule_180	193	0.0634	0	205.251	-24.802	36.175	15.852	-8.996	-9.217	9	-0.307	-2.758	covalent_docking_Set_2_and_3
molecule_87	194	0	0	266.235	0.16	49.213	17.319	-10.9	-10.312	45.5	-0.361	-2.75	covalent_docking_Set_2_and_3	1
molecule_210	195	0.5176	1	112.78	9.526	15.565	10.285	-17.871	-11.959	5.5	-0.733	-2.749	covalent_docking_Set_2_and_3
molecule_196	196	0.1486	0	200.716	-38.353	34.655	16.926	-8.977	-9.783	-5.5	-0.563	-2.747	covalent_docking_Set_2_and_3
molecule_82	197	0	0	279.4	-8.032	50.438	18.205	-9.187	-12.191	39.2	-0.33	-2.747	covalent_docking_Set_2_and_3	1
molecule_133	198	0.1486	0	211.069	-4.488	34.035	18.242	-6.818	-9.485	31.5	-0.106	-2.74	covalent_docking_Set_2_and_3
molecule_205	199	1.3035	1	112.705	-16.534	11.313	16.082	-21.436	-9.692	-20.3	-0.385	-2.737	covalent_docking_Set_2_and_3
molecule_12	200	0	0	74.332	-11.267	9.465	10.361	-8.488	-8.184	-8.1	-0.547	-2.729	covalent_docking_Set_2_and_3	1
Set_2_2	201	0.0183	1	139.247	-17.658	18.691	15.031	-20.476	-9.881	-14.3	-0.371	-2.718	covalent_docking_Set_2_and_3
molecule_43	202	0.0204	0	66.997	-41.859	9.741	11.233	-7.973	-7.123	-36	-0.774	-2.716	covalent_docking_Set_2_and_3
molecule_231	203	0	0	241.674	0.539	48.386	11.979	-9.599	-11.227	40.1	-0.438	-2.714	covalent_docking_Set_2_and_3	1
molecule_39	204	0	0	55.786	-10.53	9.688	5.843	-8.59	-7.034	-10.6	-0.849	-2.714	covalent_docking_Set_2_and_3	1
molecule_130	205	0.1486	0	225.962	-5.186	36.229	19.126	-8.313	-9.315	32.5	-0.264	-2.712	covalent_docking_Set_2_and_3
molecule_224	206	0.1062	0	276.372	-28.801	51.256	17.113	-13.08	-10.69	15.8	-0.212	-2.71	covalent_docking_Set_2_and_3
molecule_36	207	0	0	55.881	-12.209	10.091	5.517	-8.65	-7.852	-13.1	-0.74	-2.709	covalent_docking_Set_2_and_3	1
molecule_42	208	0.2742	1	66.597	16.377	9.385	5.832	-54.091	-6.396	-28.9	-0.843	-2.699	covalent_docking_Set_2_and_3
molecule_7	209	0	0	75.805	-13.041	9.576	10.861	-7.846	-7.713	-8.2	-0.685	-2.696	covalent_docking_Set_2_and_3	1
molecule_81	210	0	0	275.266	0.336	51.766	17.068	-8.761	-13.285	47.1	-0.269	-2.694	covalent_docking_Set_2_and_3	1
molecule_210	211	0.4985	0	180.855	21.166	31.186	11.178	-7.941	-9.39	46.2	-0.74	-2.692	covalent_docking_Set_2_and_3
molecule_126	212	0.1486	0	206.723	-5.122	34.424	15.998	-8.202	-10.314	26.8	-0.399	-2.684	covalent_docking_Set_2_and_3
molecule_162	213	0.0089	0	249.945	1.309	45.328	16.801	-9.623	-10.813	43	-0.18	-2.68	covalent_docking_Set_2_and_3
molecule_140	214	0.1193	1	124.756	7.565	13.625	15.087	-15.964	-14.087	6.2	-0.562	-2.664	covalent_docking_Set_2_and_3
molecule_95	215	0	0	259.867	-1.51	48.411	16.5	-8.777	-11.261	43.4	-0.079	-2.655	covalent_docking_Set_2_and_3	1
molecule_190	216	0.184	1	193.187	23.507	33.1	12.988	-50.312	-7.319	12	-0.675	-2.649	covalent_docking_Set_2_and_3
molecule_132	217	0.1486	0	220.785	-4.099	35.973	18.398	-8.309	-9.91	32.1	-0.106	-2.646	covalent_docking_Set_2_and_3
molecule_45	218	0.028	0	67.695	-41.439	9.723	11.175	-9.577	-7.083	-37.2	-0.774	-2.643	covalent_docking_Set_2_and_3
molecule_75	219	0.0454	0	244.055	7.916	41.338	18.894	-8.488	-10.032	49.6	-0.106	-2.642	covalent_docking_Set_2_and_3
molecule_211	220	0.666	0	177.68	18.287	30.624	11.286	-6.127	-9.383	44.7	-0.733	-2.639	covalent_docking_Set_2_and_3
molecule_223	221	0.0678	1	287.181	19.123	51.567	16.477	-49.818	-10.632	26.7	-0.276	-2.638	covalent_docking_Set_2_and_3
molecule_127	222	0.1486	0	207.369	-4.397	34.459	16.033	-8.099	-10.315	27.7	-0.431	-2.638	covalent_docking_Set_2_and_3
molecule_10	223	0	0	74.975	-12.018	9.48	10.65	-8.172	-7.401	-7.5	-0.658	-2.632	covalent_docking_Set_2_and_3	1
molecule_125	224	0.1486	0	206.868	-1.054	35.53	15.191	-10.015	-12.72	26.9	-0.399	-2.622	covalent_docking_Set_2_and_3
molecule_196	225	0.8922	1	209.853	-43.928	38.754	15.702	-19.156	-9.749	-18.4	-0.559	-2.6	covalent_docking_Set_2_and_3
Set_2_22	226	0	0	141.081	-10.261	17.369	18.054	-5.088	-10.741	9.3	-0.713	-2.599	covalent_docking_Set_2_and_3	1
molecule_187	227	0.0063	0	185.014	-12.254	33.746	13.356	-7.328	-8.158	19.4	-0.658	-2.591	covalent_docking_Set_2_and_3
molecule_50	228	0.0994	1	111.009	11.892	13.997	11.041	-16.184	-10.021	10.7	-1.177	-2.584	covalent_docking_Set_2_and_3
molecule_16	229	0	0	74.062	-12.492	9.512	10.396	-7.319	-7.846	-7.7	-0.243	-2.584	covalent_docking_Set_2_and_3	1
molecule_193	230	0.0174	0	188.406	-9.23	35.539	10.872	-7.828	-10.255	19.1	-0.528	-2.584	covalent_docking_Set_2_and_3
molecule_208	231	0.4322	0	178.987	20.571	31.119	10.836	-6.453	-10.884	45.2	-0.623	-2.573	covalent_docking_Set_2_and_3
molecule_202	232	0.5176	1	112.696	-35.942	12.516	16.8	-19.172	-9.123	-34.9	-0.385	-2.565	covalent_docking_Set_2_and_3
molecule_129	233	0.8922	1	231.325	-0.76	37.966	15.858	-19.264	-10.252	23.5	-0.257	-2.563	covalent_docking_Set_2_and_3
molecule_66	234	0.0454	0	237.684	1.749	41.107	17.983	-8.341	-10.112	42.4	-0.132	-2.563	covalent_docking_Set_2_and_3
molecule_92	235	0	0	260.228	-1.602	48.415	16.615	-8.827	-11.287	43.3	-0.265	-2.562	covalent_docking_Set_2_and_3	1
molecule_122	236	0.8922	1	207.626	-6.069	37.209	13.493	-15.996	-14.108	14.5	-0.024	-2.562	covalent_docking_Set_2_and_3
molecule_121	237	0.8922	1	210.664	-6.25	37.012	13.785	-17.769	-12.356	14.4	-0.383	-2.558	covalent_docking_Set_2_and_3
molecule_135	238	0.0994	1	95.654	11.599	9.685	11.673	-16.778	-7.744	8.4	-1.177	-2.558	covalent_docking_Set_2_and_3
molecule_186	239	0.4562	1	216.71	8.445	35.753	18.359	-49.5	-8.902	4.2	-0.289	-2.556	covalent_docking_Set_2_and_3
molecule_166	240	0.0669	1	264.913	22.886	44.115	17.971	-49.686	-9.416	25.9	-0.289	-2.546	covalent_docking_Set_2_and_3
molecule_186	241	0.3811	0	203.078	-47.288	35.232	18.779	-8.891	-8.81	-11	-0.305	-2.539	covalent_docking_Set_2_and_3
molecule_145	242	0.1193	1	122.657	8.578	13.138	14.929	-16.611	-12.776	7.3	-0.557	-2.535	covalent_docking_Set_2_and_3
molecule_201	243	0.5464	1	136.37	15.03	16.57	13.862	-17.409	-11.791	16.3	-0.39	-2.532	covalent_docking_Set_2_and_3
molecule_167	244	0.1048	0	248.761	-25.647	43.858	18.578	-12.442	-9.483	14.9	-0.351	-2.531	covalent_docking_Set_2_and_3
molecule_124	245	0.1486	0	199.866	-7.554	34.738	14.764	-8.546	-12.989	20.4	-0.031	-2.506	covalent_docking_Set_2_and_3
molecule_72	246	0.0454	0	248.273	4.795	41.214	19.974	-8.436	-9.67	47.9	-0.315	-2.496	covalent_docking_Set_2_and_3
molecule_181	247	0	0	204.073	-12.442	35.548	14.676	-7.628	-11.542	18.6	-0.18	-2.494	covalent_docking_Set_2_and_3	1
molecule_15	248	0	0	73.874	-11.13	9.475	10.199	-8.422	-8.115	-8	-0.243	-2.481	covalent_docking_Set_2_and_3	1
molecule_33	249	0.3418	1	90.027	22.176	11.215	10.631	-52.983	-7.219	-16.2	-0.501	-2.464	covalent_docking_Set_2_and_3
molecule_154	250	0.107	1	109.356	14.216	8.708	15.688	-19.063	-10.033	9.5	-0.491	-2.462	covalent_docking_Set_2_and_3
molecule_199	251	0.5975	1	122.832	-7.747	13.572	15.562	-19.809	-8.793	-7.2	-0.385	-2.454	covalent_docking_Set_2_and_3
Set_2_13	252	0.0063	1	161.029	1.06	21.959	15.274	-16.062	-10.548	11.7	-0.555	-2.452	covalent_docking_Set_2_and_3
molecule_122	253	0.1486	0	202.719	-0.144	35.318	14.276	-8.769	-14.799	25.9	-0.031	-2.45	covalent_docking_Set_2_and_3
molecule_132	254	0.8922	1	216.646	0.526	37.26	14.522	-17.646	-12.414	22.2	-0.099	-2.43	covalent_docking_Set_2_and_3
Set_2_14	255	0.0023	1	150.756	2.269	20.551	14.383	-16.455	-10.261	10.5	-0.46	-2.416	covalent_docking_Set_2_and_3
molecule_203	256	0.569	2	143.072	27.91	13.86	16.47	-62.356	-9.514	-13.6	-0.378	-2.412	covalent_docking_Set_2_and_3
Set_2_19	257	0	2	260.426	21.964	40.705	15.773	-44.676	-14.972	18.8	0	-2.412	covalent_docking_Set_2_and_3	1
molecule_200	258	0.5998	1	120.728	3.475	12.994	14.462	-17.456	-11.117	2.4	-0.269	-2.407	covalent_docking_Set_2_and_3
molecule_152	259	0.1193	1	112.669	15.252	9.248	16.092	-17.442	-10.011	13.1	-0.488	-2.399	covalent_docking_Set_2_and_3
molecule_117	260	0.8922	1	210.744	-5.934	37.014	13.95	-17.323	-11.919	15.8	-0.44	-2.368	covalent_docking_Set_2_and_3
molecule_14	261	0	0	73.612	-13.435	9.789	10.004	-8.451	-8.941	-11	-0.253	-2.362	covalent_docking_Set_2_and_3	1
molecule_120	262	0.8922	1	210.146	-5.626	37.028	13.74	-17.555	-12.691	14.9	-0.329	-2.345	covalent_docking_Set_2_and_3
molecule_209	263	0.2112	1	184.21	48.506	30.087	11.362	-46.697	-8.241	35	-0.726	-2.336	covalent_docking_Set_2_and_3
molecule_6	264	0	0	75.529	-13.028	9.57	10.78	-7.744	-7.956	-8.4	-0.685	-2.323	covalent_docking_Set_2_and_3	1
molecule_213	265	0.5998	1	102.538	15.025	11.746	10.543	-17.61	-10.198	9.5	-0.636	-2.32	covalent_docking_Set_2_and_3
Set_2_12	266	0.0041	1	151.62	0.464	20.78	14.525	-16.706	-10.04	9	-0.555	-2.313	covalent_docking_Set_2_and_3
molecule_156	267	0.1193	1	132.578	13.204	13.581	16.24	-16.7	-12.78	13.5	-0.379	-2.274	covalent_docking_Set_2_and_3
molecule_212	268	0.6072	1	105.173	6.861	12.972	10.635	-17.872	-9.839	2.8	-0.617	-2.273	covalent_docking_Set_2_and_3
Set_2_16	269	0.1447	1	231.768	2.829	40.545	15.685	-20.093	-10.799	28.2	-0.514	-2.21	covalent_docking_Set_2_and_3
molecule_197	270	0.8922	1	204.892	-37.996	37.182	14.98	-18.844	-11.681	-16.4	-0.556	-2.187	covalent_docking_Set_2_and_3
molecule_119	271	0.8922	1	209.197	-6.121	37.215	13.888	-16.559	-14.107	14.3	-0.328	-2.182	covalent_docking_Set_2_and_3
molecule_158	272	0.1193	1	130.203	16.316	14.11	16.414	-14.663	-14.012	18.2	-0.194	-2.168	covalent_docking_Set_2_and_3
molecule_133	273	0.8922	1	227.321	1.264	37.759	15.165	-19.344	-10.526	24.3	-0.137	-2.16	covalent_docking_Set_2_and_3
molecule_206	274	0.5176	1	101.96	4.633	11.925	11.547	-17.748	-8.958	1.4	-0.788	-2.152	covalent_docking_Set_2_and_3
molecule_142	275	0.1193	1	121.798	7.759	13.113	15.137	-16.244	-13.114	6.7	-0.6	-2.15	covalent_docking_Set_2_and_3
molecule_184	276	0.0624	1	219.752	0.993	36.477	16.756	-42.469	-9.923	1.8	-0.289	-2.149	covalent_docking_Set_2_and_3
molecule_212	277	0.6821	1	89.317	8.085	9.589	10.901	-18.174	-10.2	0.2	-0.617	-2.142	covalent_docking_Set_2_and_3
molecule_126	278	0.8922	1	223.105	0.79	37.566	14.341	-20.433	-10.256	22	-0.394	-2.128	covalent_docking_Set_2_and_3
molecule_137	279	0.1193	1	119.721	5.785	10.929	17.545	-17.206	-11.42	5.6	-0.472	-2.12	covalent_docking_Set_2_and_3
Set_2_4	280	0	2	156.269	22.326	18.13	13.731	-43.107	-9.924	1.2	-0.47	-2.098	covalent_docking_Set_2_and_3	1
molecule_139	281	0.1193	1	122.345	6.186	10.823	17.485	-17.794	-10.505	6.2	-0.468	-2.083	covalent_docking_Set_2_and_3
molecule_215	282	0.1134	1	95.988	-30.227	9.872	16.992	-17.667	-9.526	-30.6	-0.651	-2.065	covalent_docking_Set_2_and_3
molecule_150	283	0.1193	1	106.197	9.513	8.656	15.466	-17.375	-10.675	5.6	-0.128	-2.048	covalent_docking_Set_2_and_3
molecule_207	284	0.9838	1	110.139	12.1	14.864	10.02	-16.857	-11.687	8.4	-0.732	-2.019	covalent_docking_Set_2_and_3
molecule_157	285	0.1193	1	117.828	12.587	9.11	17.218	-17.927	-10.028	11	-0.351	-2.006	covalent_docking_Set_2_and_3
molecule_203	286	0.5718	1	211.045	26.337	32.623	16.762	-40.074	-9.585	26.1	-0.426	-2.002	covalent_docking_Set_2_and_3
molecule_138	287	0.1193	1	137.328	7.205	15.33	16.423	-16.97	-13.521	8.5	-0.453	-1.965	covalent_docking_Set_2_and_3
molecule_153	288	0.1193	1	109.182	14.559	8.705	15.608	-18.923	-10.031	9.9	-0.488	-1.959	covalent_docking_Set_2_and_3
molecule_201	289	0.9098	1	132.476	6.81	17.466	14.213	-17.809	-12.03	8.7	-0.381	-1.951	covalent_docking_Set_2_and_3
molecule_205	290	0.9529	1	208.006	33.757	32.496	16.948	-46.545	-9.652	27	-0.385	-1.948	covalent_docking_Set_2_and_3
molecule_204	291	1.1883	2	138.555	38.434	11.431	15.543	-65.537	-9.735	-9.9	-0.378	-1.936	covalent_docking_Set_2_and_3
Set_2_9	292	0.3204	2	178.213	32.991	22.704	13.637	-43.263	-10.908	15.2	-0.604	-1.934	covalent_docking_Set_2_and_3
Set_2_3	293	0	1	153.484	-5.768	21.378	14.84	-15.943	-11.095	3.4	-0.577	-1.918	covalent_docking_Set_2_and_3	1
molecule_207	294	0.2375	1	101.993	8.733	13.936	9.978	-16.655	-11.765	4.2	-0.726	-1.916	covalent_docking_Set_2_and_3
molecule_222	295	0.2473	1	288.576	20.954	51.576	16.47	-47.816	-10.519	30.7	-0.268	-1.913	covalent_docking_Set_2_and_3
molecule_224	296	1.0709	1	289.57	29.857	52.449	16.439	-53.99	-10.393	34.4	-0.213	-1.905	covalent_docking_Set_2_and_3
molecule_205	297	0.9605	2	140.143	35.37	13.74	16.657	-68.818	-9.58	-12.6	-0.378	-1.9	covalent_docking_Set_2_and_3
molecule_128	298	0.8922	1	243.174	-2.003	43.206	16.316	-18.421	-9.234	29.9	-0.256	-1.892	covalent_docking_Set_2_and_3
Set_2_9	299	0.8164	2	171.476	21.748	24.53	12.701	-38.25	-13.795	6.9	-0.603	-1.889	covalent_docking_Set_2_and_3
molecule_209	300	0.7137	2	126.144	50.846	14.369	10.521	-69.112	-10.489	-3.9	-0.719	-1.888	covalent_docking_Set_2_and_3
molecule_147	301	0.1193	1	121.651	9.588	13.118	14.742	-16.587	-13.528	7.3	-0.423	-1.853	covalent_docking_Set_2_and_3
molecule_123	302	0.8922	1	209.88	-5.502	37.026	13.615	-17.428	-12.613	15.1	-0.024	-1.845	covalent_docking_Set_2_and_3
molecule_204	303	0.5464	2	141.717	27.119	13.796	16.517	-63.908	-9.625	-16.1	-0.078	-1.839	covalent_docking_Set_2_and_3
molecule_118	304	0.8922	1	211.167	-6.65	37.009	13.958	-17.634	-11.916	14.8	-0.44	-1.838	covalent_docking_Set_2_and_3
molecule_141	305	0.1193	1	121.547	7.861	13.265	14.868	-16.242	-13.305	6.4	-0.562	-1.802	covalent_docking_Set_2_and_3
molecule_130	306	0.8922	1	242.597	0.561	39.313	17.591	-21.62	-9.193	26.7	-0.268	-1.802	covalent_docking_Set_2_and_3
Set_2_6	307	0.0198	1	231.092	-21.562	39.019	17.147	-18.89	-11.497	4.2	0	-1.795	covalent_docking_Set_2_and_3
molecule_159	308	0.1193	1	128.146	15.794	13.416	15.42	-16.709	-13.246	14.7	-0.197	-1.781	covalent_docking_Set_2_and_3
molecule_208	309	0.4182	1	111.199	9.065	15.533	9.924	-16.654	-13.474	4.4	-0.618	-1.765	covalent_docking_Set_2_and_3
Set_2_11	310	0.0446	1	151.68	-1.762	20.011	15.335	-16.332	-10.22	7	-0.651	-1.76	covalent_docking_Set_2_and_3
molecule_136	311	0.1193	1	122.187	9.896	13.105	14.99	-16.456	-12.771	8.8	-0.658	-1.735	covalent_docking_Set_2_and_3
molecule_131	312	0.8922	1	228.931	2.658	38.635	15.765	-17.252	-11.451	28.4	-0.1	-1.726	covalent_docking_Set_2_and_3
molecule_148	313	0.1193	1	106.976	8.74	8.652	15.644	-17.695	-10.439	4.9	-0.423	-1.675	covalent_docking_Set_2_and_3
molecule_151	314	0.1193	1	121.942	9.106	13.17	14.573	-16.641	-13.138	7.1	-0.131	-1.635	covalent_docking_Set_2_and_3
molecule_204	315	0.5129	1	210.122	25.989	32.569	16.804	-41.881	-9.696	23.8	-0.385	-1.633	covalent_docking_Set_2_and_3
Set_2_7	316	0.0023	1	202.686	-9.825	28.789	20.464	-14.987	-17.958	6.5	-0.071	-1.568	covalent_docking_Set_2_and_3
Set_2_5	317	0.0195	1	275.081	18.085	42.229	22.48	-17.117	-14.257	51.4	0	-1.444	covalent_docking_Set_2_and_3
molecule_165	318	0.2524	1	265.691	22.375	43.961	18.225	-48.133	-9.086	27.3	-0.289	-1.319	covalent_docking_Set_2_and_3
